# Supplementary material for: Anionic Polysaccharide Cryogels: Interaction and In Vitro Behavior of Alginate–Gum Arabic Composites
Source: MDPI journal article supplement (doi:10.3390/polym15081844), 2023-04-11
Supplement: s1 [file s1]

## Anionic Polysaccharide Hydrogels: Interaction and *In Vitro* Behavior of Alginate-gum arabic Composites

Alexandra Feraru<sup>1,2</sup>, Zsejke-Réka Tóth<sup>1,2</sup>, Marieta Mureșan-Pop<sup>2</sup>, Monica Baia<sup>3,4</sup>, Tamás Gyulavári<sup>5</sup>,  
Emőke Páll<sup>6</sup>, Romulus V. F. Turcu<sup>3,7</sup>, Klára Magyari<sup>2\*</sup>, Lucian Baia<sup>2,3,4\*</sup>

<sup>1</sup>Doctoral School of Physics, Babes-Bolyai University, M. Kogălniceanu 1, 400084 Cluj-Napoca, Romania

<sup>2</sup>Nanostructured Materials and Bio-Nano-Interfaces Center, Interdisciplinary Research Institute on Bio-Nano-Sciences, Babes-Bolyai University, T. Laurian 42, 400271 Cluj-Napoca, Romania

<sup>3</sup>Faculty of Physics, Babes-Bolyai University, M. Kogălniceanu 1, 400084 Cluj-Napoca, Romania

<sup>4</sup>Institute for Research-Development-Innovation in Applied Natural Sciences, Babes-Bolyai University, Fântânele 30, 400294, Cluj-Napoca, Romania

<sup>5</sup>Department of Applied and Environmental Chemistry, University of Szeged, Rerrich B. sqr. 1, Szeged 6720, Hungary

<sup>6</sup>Faculty of Veterinary Medicine, University of Agricultural Science and Veterinary Medicine, 400372 Cluj-Napoca, Romania

<sup>7</sup>National Institute for Research and Development of Isotopic and Molecular Technologies, Donath 67-103, 400293 Cluj-Napoca, Romania

\* Correspondence: klara.magyari@ubbcluj.ro (K.M.); lucian.baia@ubbcluj.ro (L.B.); Tel.: +40-264405300 (L.B. )

### Supplementary Materials

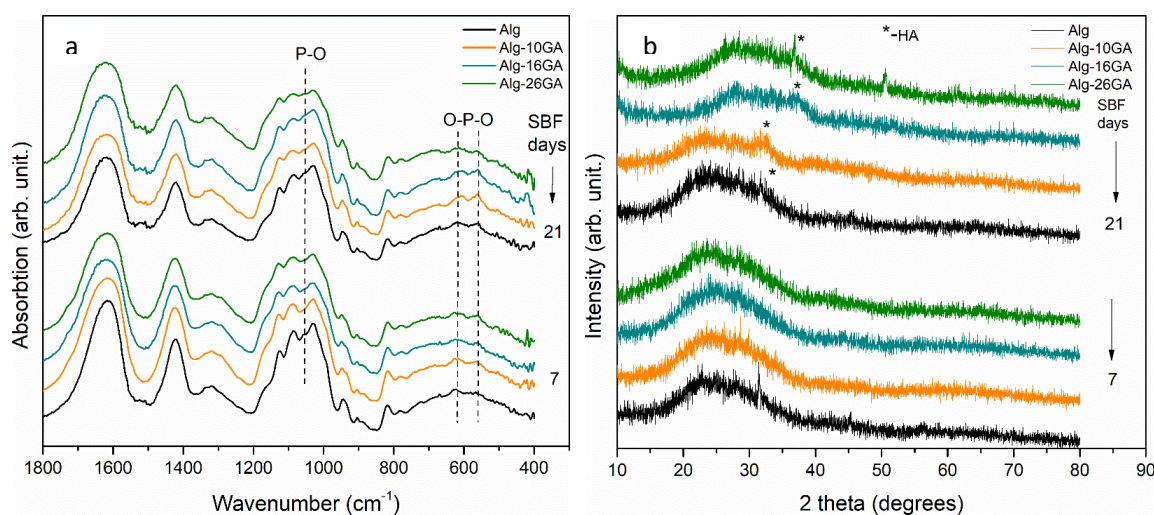

Figure S1. FT-IR spectra (a) and XRD patterns (b) of Alg-xGA (x=0; 10; 16; 26 wt%) composites before and after immersion in simulated body fluid for 7 and 21 days.
